# Supplementary material
Source: Springer Nature journal article supplement (https://www.springermedizin.de/resource/supplementary/13054_2004_2995_MOESM5_ESM.pdf/9719466)

# T-cells

■ without flushing  
□ flushing

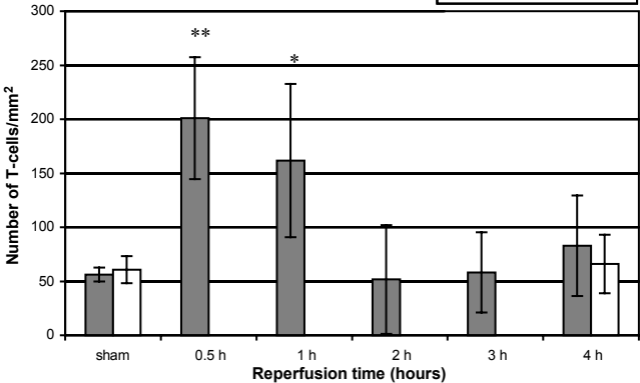

Supplement: MOESM5 [file 9719466]
